# Supplementary material for: Stimuli-responsive thiol-epoxy networks with photo-switchable bulk and surface properties
Source: Royal Society of Chemistry journal article supplement (doi:10.1039/c8ra08937j), 2018-01-01
Supplement: c8ra08937j1.pdf [file c8ra08937j1.pdf]

## Stimuli-responsive thiol-epoxy networks with photo-switchable bulk and surface properties

A. Romano,<sup>a</sup> I. Roppolo,<sup>a</sup> M. Giebler,<sup>b</sup> K. Dietliker,<sup>c</sup> Š. Možina,<sup>d</sup> P. Šket,<sup>d,e</sup> I. Mühlbacher,<sup>b</sup> S. Schlögl<sup>b</sup> and M. Sangermano<sup>a</sup>

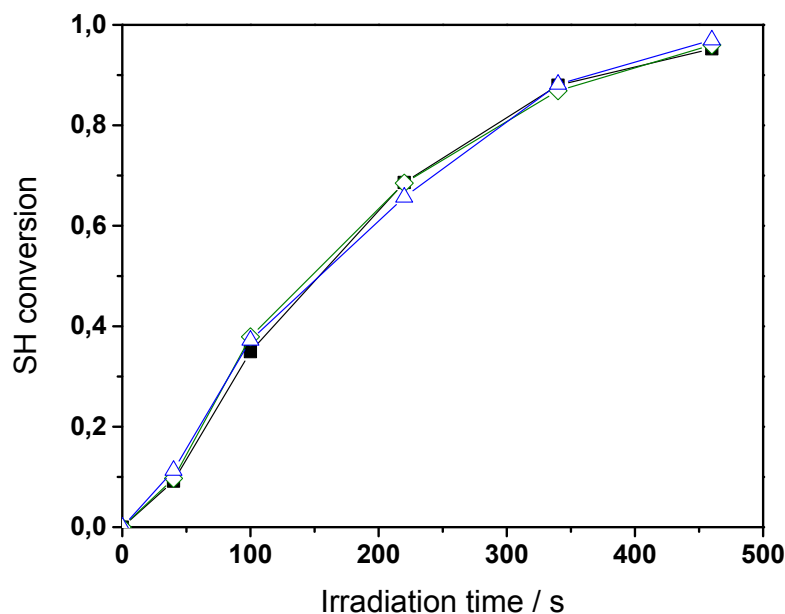

**Figure S1** – Normalized depletion of the thiol absorption band ( $2580\text{ cm}^{-1}$ ) versus illumination time ( $4\text{ J/cm}^2$ ,  $\lambda > 400\text{ nm}$ , air). Resin formulations contained varying amounts of epoxy-GME at a given PLB and ITX level of 4 wt%: **PI4** (solid squares); **PI4-G5** (open diamonds) and **PI4-G7** (open triangles).

<sup>a</sup> Department of Applied Science and Technology, Politecnico di Torino, Corso Duca degli Abruzzi 24, 10129 Torino, Italy.

<sup>b</sup> Polymer Competence Center Leoben GmbH, Roseggerstraße 12, A-8700 Leoben, Austria.

<sup>c</sup> Department of Chemistry and Applied Biosciences, ETH Zürich, Vladimir-Prelog Weg 1-5/10, CH-8093 Zürich, Switzerland.

<sup>d</sup> Slovenian NMR Center, National Institute of Chemistry, Hajdrihova 19, 1000 Ljubljana, Slovenia.

<sup>e</sup> EN-FIST Center of Excellence, Trg OF 13, 1000 Ljubljana, Slovenia.

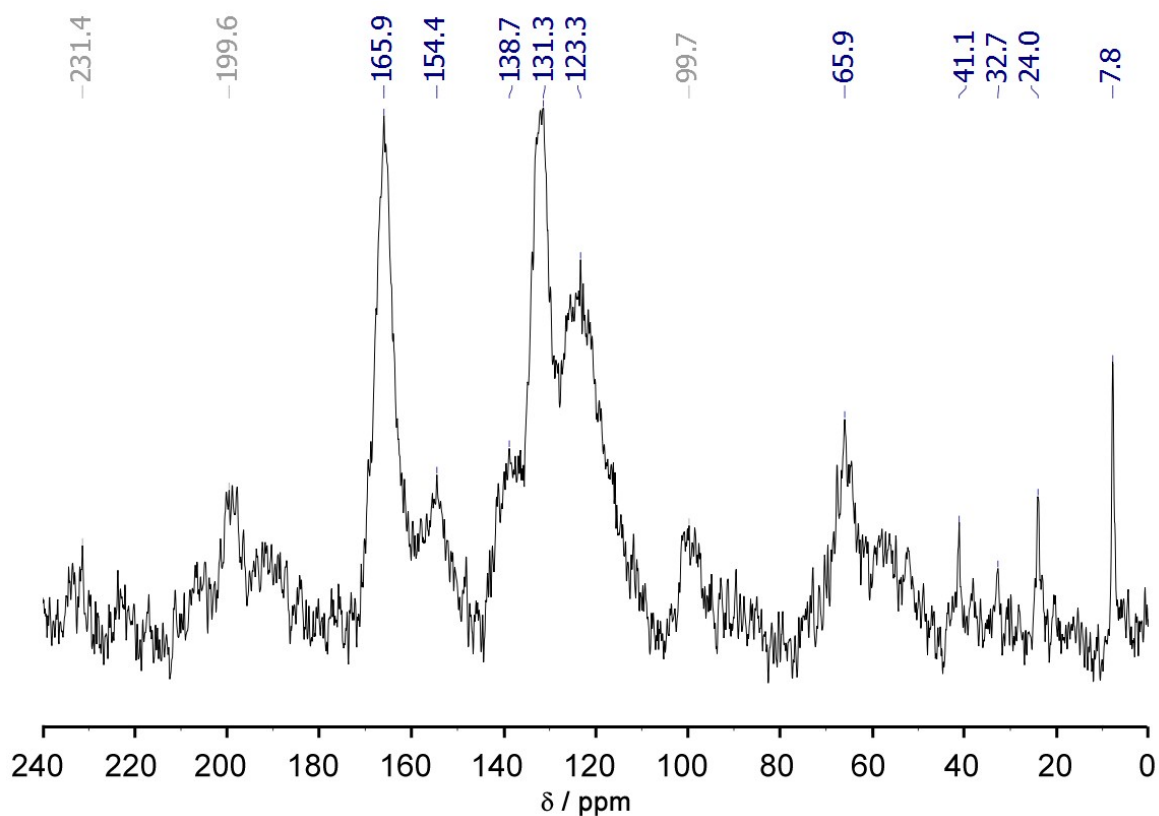

**Figure S2** –  $^{13}\text{C}$  CP/MAS solid state NMR of crosslinked **PI4-G5** acquired on 600 MHz solid state NMR. Sample was spun at 10 kHz. Chemical shift of signals belonging to the formulation components are marked in blue, spinning side bands are marked in grey.

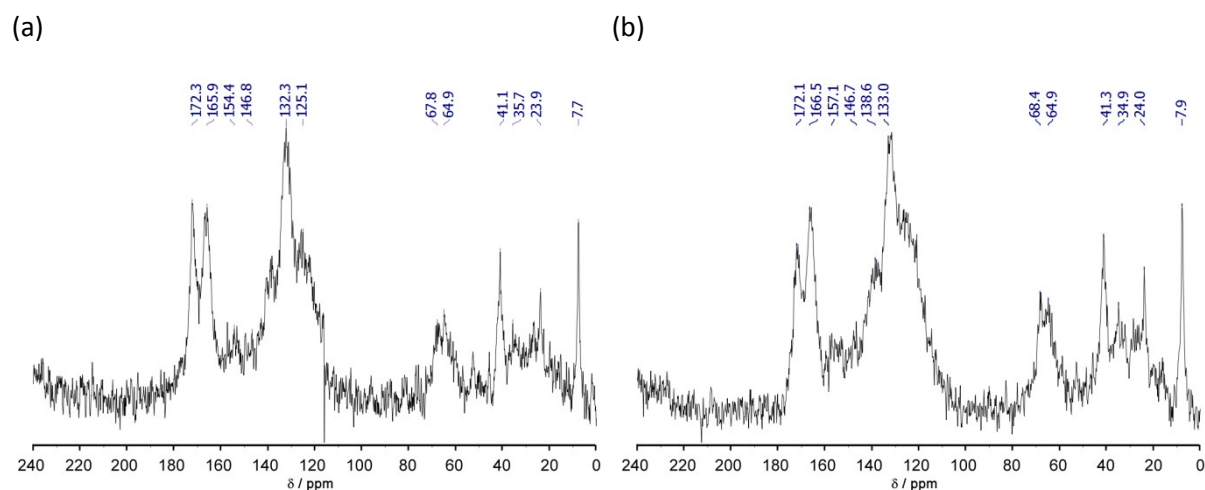

**Figure S3** –  $^{13}\text{C}$  CP/MAS solid state NMR of crosslinked **PI4-G5** illuminated with a low UV exposure dose ( $100 \text{ J/cm}^2$ ) acquired on 600 MHz solid state NMR. Sample was spun at 16 kHz. UV irradiation were carried under (a) air or (b) nitrogen.

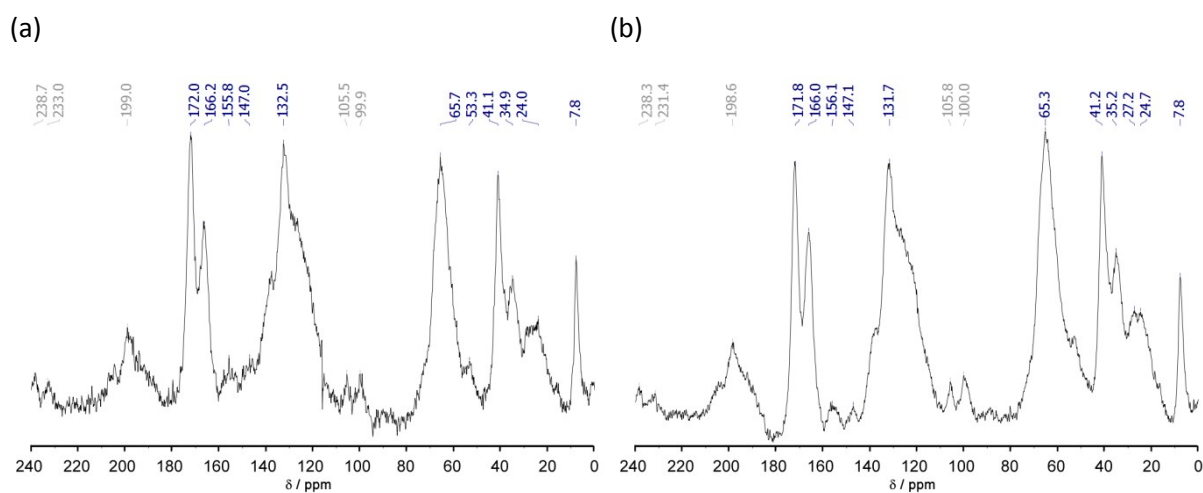

**Figure S4** –  $^{13}\text{C}$  CP/MAS solid state NMR of crosslinked **PI4-G5** illuminated with a high UV exposure dose ( $300 \text{ J}/\text{cm}^2$ ) acquired on 600 MHz solid state NMR. Sample was spun at 16 kHz. UV irradiation were carried under (a) air or (b) nitrogen. Chemical shift of signals belonging to the network and cleavage products are marked in blue, spinning side bands are marked in grey.
